# Supplementary material for: Evaluation of the Antibacterial Activity and Probiotic Potential of Lactobacillus plantarum Isolated from Chinese Homemade Pickles
Source: Hindawi journal article supplement (doi:10.1155/2020/8818989), 2020-11-18
Supplement: f1 [file 8818989.f1.docx]

## Supplemental Material

Table S1: Antibacterial spectrum of LAB strains against eight foodborne pathogens.

| Number | Isolates | Indicator bacteria* | | | | | | | |
| --- | --- | --- | --- | --- | --- | --- | --- | --- | --- |
| LM | BC | BS | SA | EC | ST | CS | PA |
| 1 | CS001 | ++ | + | - | + | - | - | ++ | - |
| 2 | CS002 | + | ++ | - | + | - | ++ | +++ | - |
| 3 | CS003 | + | ++ | - | - | - | + | ++ | - |
| 4 | CS004 | +++ | +++ | ++ | ++++ | + | ++ | ++++ | ++ |
| 5 | HZ005 | + | - | - | +++ | - | + | +++ | - |
| 6 | HZ006 | + | - | - | - | - | - | - | - |
| 7 | HZ007 | ++ | - | - | +++ | - | ++ | +++ | - |
| 8 | HZ008 | ++ | - | - | - | - | ++ | +++ | - |
| 9 | HZ009 | + | + | + | - | - | + | - | + |
| 10 | HZ010 | + | - | - | + | + | - | + | + |
| 11 | HZ011 | ++ | - | - | - | - | - | - | - |
| 12 | HZ012 | - | - | - | - | - | ++ | - | - |
| 13 | HB050 | +++ | - | - | - | - | - | +++ | + |
| 14 | HB051 | +++ | + | + | - | - | - | + | + |
| 15 | HN057 | - | - | + | - | - | + | - | - |
| 16 | HN058 | +++ | ++ | + | - | + | - | + | + |
| 17 | HN059 | ++++ | +++ | ++ | - | ++ | +++ | ++ | ++ |
| 18 | HN060 | ++ | - | - | - | - | - | ++ | + |
| 19 | HN061 | - | - | - | - | - | - | - | - |
| 20 | HN062 | ++++ | +++ | ++ | + | ++ | +++ | ++ | + |
| 21 | HN063 | ++ | - | - | - | - | ++ | - | + |
| 22 | HN064 | + | + | - | - | - | - | + | - |
| 23 | HN065 | + | + | - | - | + | - | + | - |
| 24 | HN066 | + | + | + | - | - | - | + | + |
| 25 | HN067 | + | + | + | - | - | - | + | + |
| 26 | HN068 | + | - | - | - | + | - | - | - |
| 27 | HN069 | + | - | ++ | + | - | + | ++ | + |
| 28 | HN070 | + | - | ++ | + | - | + | ++ | + |
| 29 | HN071 | + | - | ++ | + | - | + | ++ | + |
| 30 | HN072 | + | - | ++ | + | - | + | ++ | + |
| 31 | HN073 | ++ | + | ++ | - | - | - | + | + |
| 32 | JC081 | + | ++ | +++ | + | + | + | + | + |
| 33 | GS083 | ++++ | ++ | +++ | + | + | +++ | ++ | ++ |
| 34 | GS084 | ++++ | ++ | +++ | - | + | ++ | ++ | ++ |
| 35 | GS085 | ++++ | ++ | ++ | + | + | - | ++ | ++ |
| 36 | GS086 | ++++ | +++ | +++ | + | ++ | +++ | +++ | ++ |
| 37 | GS087 | +++ | +++ | ++++ | + | + | - | ++ | ++ |
| 38 | GS088 | +++ | +++ | +++ | + | + | - | ++ | ++ |

Continued Table S1

| Number | Isolates | Indicator bacteria* | | | | | | | |
| --- | --- | --- | --- | --- | --- | --- | --- | --- | --- |
| LM | BC | BS | SA | EC | ST | CS | PA |
| 39 | GS089 | ++++ | +++ | +++ | + | + | +++ | +++ | +++ |
| 40 | GS090 | ++++ | +++ | +++ | + | + | +++ | +++ | +++ |
| 41 | GS091 | +++ | ++ | + | + | + | - | ++ | ++ |
| 42 | GS092 | +++ | +++ | +++ | ++ | - | - | ++ | ++ |
| 43 | XP093 | - | + | - | - | - | - | - | - |
| 44 | XP094 | + | + | - | - | - | - | + | + |
| 45 | XP095 | ++ | + | + | - | - | + | + | + |
| 46 | XP096 | + | + | + | - | - | - | + | + |
| 47 | XP097 | ++++ | ++ | ++ | ++ | ++ | ++ | +++ | + |
| 48 | XP098 | + | + | ++ | + | - | - | + | + |
| 49 | XP099 | ++ | + | ++ | + | - | - | + | + |
| 50 | LF100 | ++ | + | + | - | - | + | + | - |
| 51 | GF105 | + | + | +++ | - | - | - | ++ | + |
| 52 | GF106 | + | + | + | + | - | + | + | - |
| 53 | GF107 | ++ | - | + | + | - | + | + | - |
| 54 | GF109 | + | - | ++ | + | ++ | ++ | - | + |
| 55 | GF112 | + | + | + | - | - | - | + | + |
| 56 | GF113 | + | + | ++ | - | - | + | + | - |
| 57 | GF114 | + | + | + | - | - | - | - | + |
| 58 | XZ123 | +++ | ++ | +++ | + | + | ++ | ++ | ++ |
| 59 | XZ124 | ++ | ++ | ++++ | + | - | + | ++ | ++ |

* LM: *L. monocytogenes* ATCC 19117, BC: *B. cereus* ATCC 14579, BS: *B. subtilis* ATCC 6633, SA: *S. aureus* ATCC 25923, EC: *E. coli* ATCC 8739, ST: *S.* Typhimurium ATCC 14028, CS: *C. sakazakii* ATCC 29544, PA: *P. aeruginos* ATCC 15442. The diameter of inhibition zone (mm): - < 6, 6 < + < 10, 10 < ++ < 14, 14 < +++ < 18, ++++ > 18.

Table S2: Antibacterial spectrum of LAB strains against six multidrug-resistant bacteria.

| Isolates | Indicator bacteria* | | | | | |
| --- | --- | --- | --- | --- | --- | --- |
| LM | BC | SA | EC | ST | CS |
| CS004 | +++ | ++ | ++ | - | ++ | ++ |
| HN062 | ++++ | ++ | - | - | ++ | + |
| JC081 | + | ++ | - | + | + | - |
| **GS083** | **++++** | **++** | **+** | **++** | **++** | **+** |
| **GS086** | **++++** | **++** | **+** | **+** | **+** | **+** |
| GS089 | ++ | ++ | + | - | + | + |
| **GS090** | **++++** | **++** | **+** | **++** | **++** | **+** |
| XP097 | ++++ | + | ++ | - | ++ | ++ |
| XZ123 | +++ | - | + | + | ++ | - |

* LM: *L. monocytogenes* 1846-1, BC: *B. cereus* 3311-2A, SA: *S. aureus*117-2, EC: *E. coli* 2624-2, ST: *S.* Typhimurium 54-9, CS: *C. sakazakii* cro 300A.The diameter of inhibition zone (mm): - < 6, 6 < + < 10, 10 < ++ < 14, 14 < +++ < 18, ++++ > 18.
